# Supplementary material for: Facile synthesis of defect-induced highly-luminescent pristine MgO nanostructures for promising solid-state lighting applications
Source: Royal Society of Chemistry journal article supplement (doi:10.1039/c5ra21150f), 2015-12-15
Supplement: c5ra21150f1.pdf [file c5ra21150f1.pdf]

## **Supporting Information**

**Facile synthesis of defect-induced highly-luminescent pristine MgO nanostructures for promising solid-state lighting applications**

**Authors-** Navita Jain, Neeraj Marwaha, Rajni Verma, Bipin Kumar Gupta and Avanish Kumar Srivastava

National Physical Laboratory, Dr. K. S. Krishnan Road, New Delhi-110012, India

Corresponding author. Tel.: 91-11-45609308; fax: 91-11-45609310.

E-mail address: [aks@nplindia.org](mailto:aks@nplindia.org)

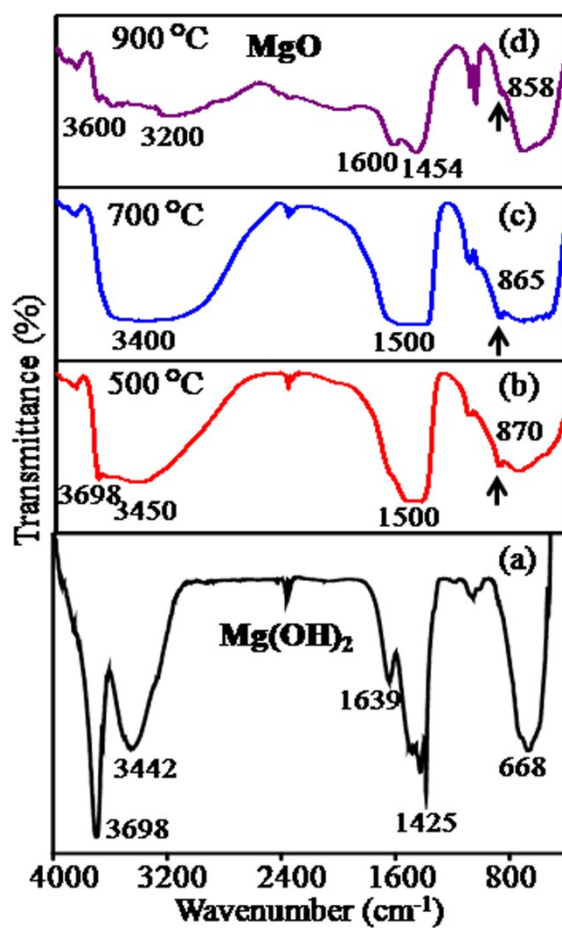

**Fig. S1** FTIR spectra of (a) as-synthesized  $\text{Mg(OH)}_2$ , MgO Sample calcined at (b) 500 °C, (c) 700 °C and (d) 900 °C

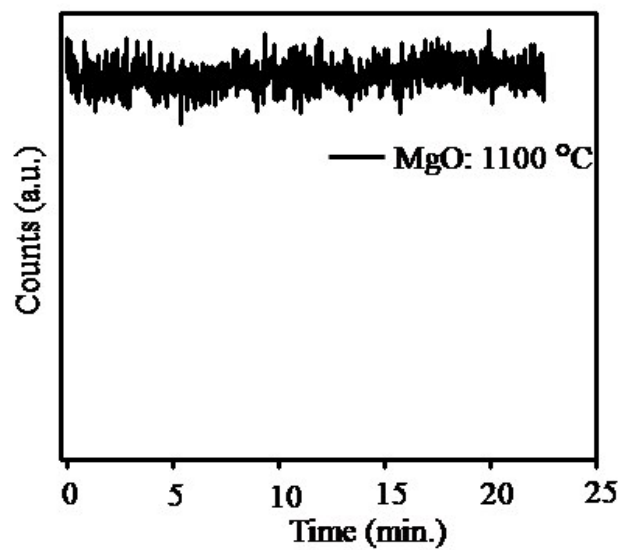

**Fig.S2** Photo-bleaching spectrum of MgO sample calcined at 1100 °C.
